# Supplementary material for: Glucagon Potentiates Insulin Secretion Via β-Cell GCGR at Physiological Concentrations of Glucose
Source: MDPI journal article supplement (doi:10.3390/cells10092495), 2021-09-21
Supplement: s1 [file s1]

## Supplementary Materials

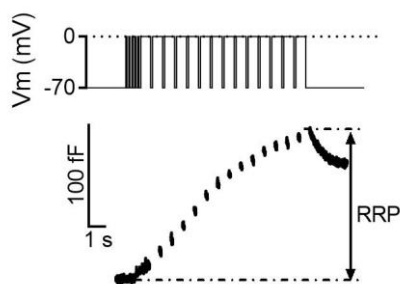

**Figure S1.** Exocytosis signals of a representative  $\beta$ -cell induced by a stimulus protocol of pulses depolarized ( $-70$  mV to  $0$  mV) via a voltage clamp in perforated whole-cell configuration. The stimulus train consisted of five 50-ms pulses followed by fourteen 500-ms pulses (100 ms intervals between pulses) to trigger vesicle secretion to assess the initial size of the RRP. The measurement of RRP was used as an assay of the individual  $\beta$ -cell secretory ability.

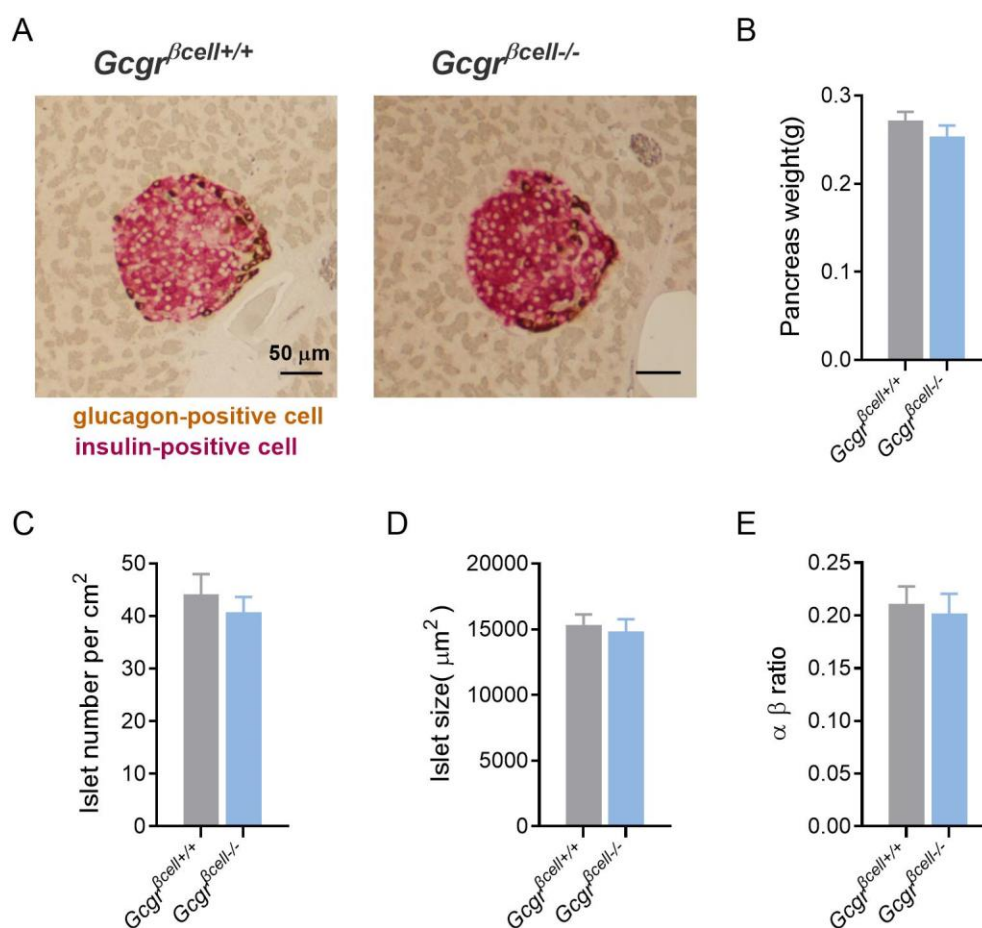

**Figure S2.** The islet structure, number, and size in *Gcgr*<sup>βcell-/-</sup> mice.

(A) Representative histological pancreatic sections from *Gcgr*<sup>βcell+/+</sup> and *Gcgr*<sup>βcell-/-</sup> mice double-stained with anti-glucagon (brown) and anti-insulin (red) antibodies (n=5 per group).

(B-E) Pancreas weights (B), islet numbers (C), islet sizes (D) and the  $\alpha$ - to  $\beta$ -cell area ratios (E) in *Gcgr*<sup>βcell+/+</sup> and *Gcgr*<sup>βcell-/-</sup> mice (n=5 per group).

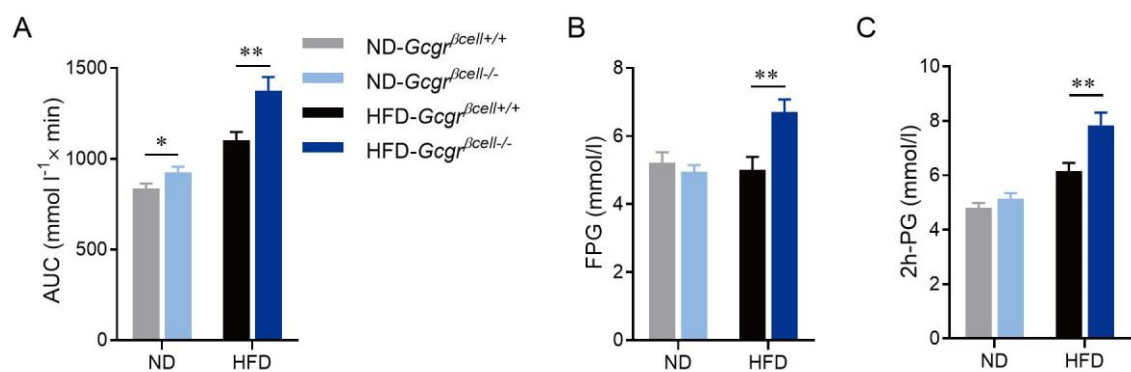

**Figure S3.** The AUCs, FPG and 2h-PG of *Gcgr<sup>βcell-/-</sup>* mice fed the ND or HFD.

(A) The areas under the curves (AUCs) in the IPGTTs with 1g/kg glucose in Figure 3F and 3H.

(B) The fasting plasma glucose (FPG) in the IPGTTs with 1g/kg glucose in Figure 3F and 3H.

(C) The 2 hour-plasma glucose (2h-PG) in the IPGTTs with 1g/kg glucose in Figure 3F and 3H.
